# Supplementary material
Source: PubMed Central journal article supplement (PMC5135657)
Supplement: NIHMS795633-supplement-09.pdf [file NIHMS795633-supplement-09.pdf]

**Supplementary Figure Captions**

**Figure S1.** Grand mean ( $N = 152$ ) event-related potential (ERP) [ $\mu\text{V}$ ] waveforms (-200 to 1300 ms, 100 ms pre-stimulus baseline) using the reference electrode standardization technique (REST; Yao, 2001) comparing negative and neutral stimuli (pooled across hemifield) at all 72 scalp sites. Distinct ERP components are labeled in italics at selected sites.

**Figure S2.** Enlargements (-100 to 1000 ms; cf. Fig. S1) of selected event-related potential (ERP) [ $\mu\text{V}$ ] waveforms at left and right parietooccipital sites. Distinct ERP components are labeled in italics at selected sites.

**Figure S3.** Grand mean ( $N = 152$ ) current source density (CSD) [ $\mu\text{V}/\text{cm}^2$ ] waveforms (-200 to 1300 ms, 100 ms pre-stimulus baseline) comparing stimuli presented to the left or right visual field (pooled across emotional content) at all 72 scalp sites. Distinct CSD components are labeled in italics at selected sites.

**Figure S4.** Grand mean ( $N = 152$ ) event-related potential (ERP) [ $\mu\text{V}$ ] waveforms (-200 to 1300 ms, 100 ms pre-stimulus baseline) using the reference electrode standardization technique (REST; Yao, 2001) comparing stimuli presented to the left or right visual field (pooled across emotional content) at all 72 scalp sites. Distinct ERP components are labeled in italics at selected sites.

**Figure S5.** Statistical evaluation of topographic emotional content effects as in Fig. 5 for each of the first seven CSD-PCA factors (cf. Fig. 4).

### Supplementary Animation Captions

**Animation A1.** Emotional content (negative-minus-neutral) topographies (72 sites, nose on top) of CSD-PCA factors corresponding to N2 sink, P3 source and a late centroparietal (CP) source and their distributed inverse solutions (sLORETA; Pascual-Marqui, 2002; Tadel et al., 2011).

**Animation A2.** Overall amplitude (grand mean) topographies (72 sites, nose on top) of CSD-PCA factors corresponding to N2 sink, P3 source and a late centroparietal (CP) source and their distributed inverse solutions (sLORETA; Pascual-Marqui, 2002; Tadel et al., 2011).

**Animation A3.** Grand mean current source density (CSD) [ $\mu\text{V}/\text{cm}^2$ ] waveforms ( $N = 152$ ) at selected parieto-occipital sites for negative and neutral stimuli with animations of corresponding CSD and REST (Yao, 2001) surface potential topographies (72 sites, nose on top) and distributed inverses (sLORETA; Pascual-Marqui, 2002; Tadel et al., 2011) of the emotional content net effect (negative-minus-neutral).
