# Supplementary material
Source: PubMed Central journal article supplement (PMC5135657)

— Neutral  
— Negative

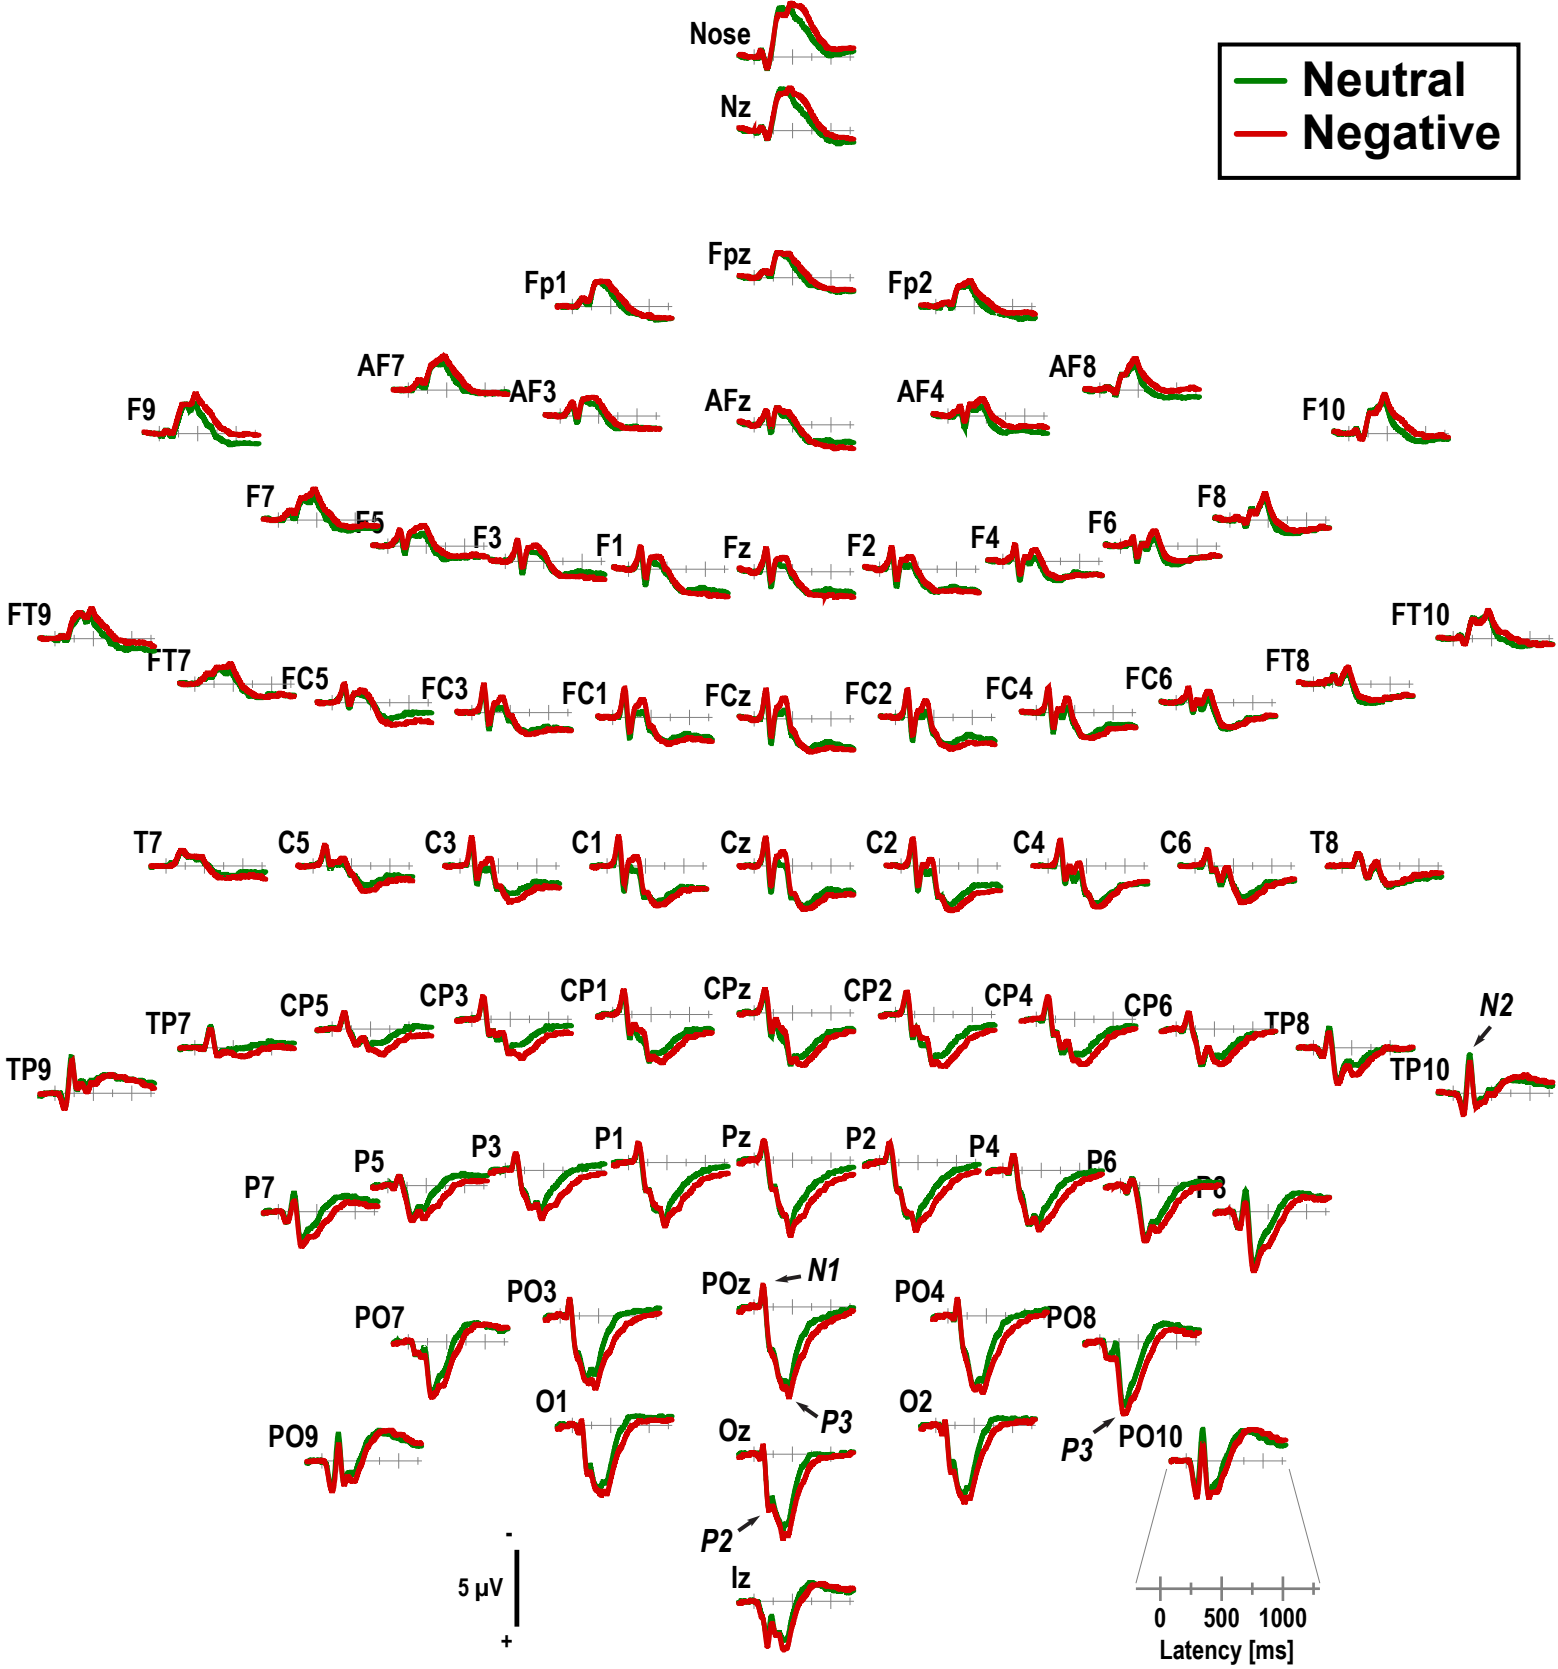

Supplement: NIHMS795633-supplement-4.pdf [file NIHMS795633-supplement-4.pdf]

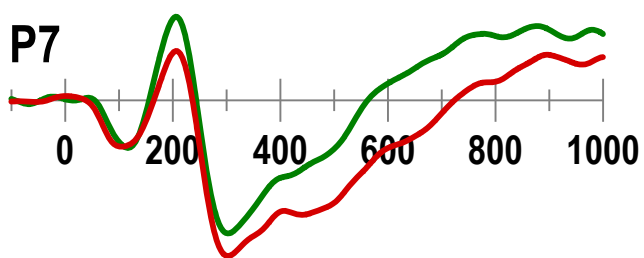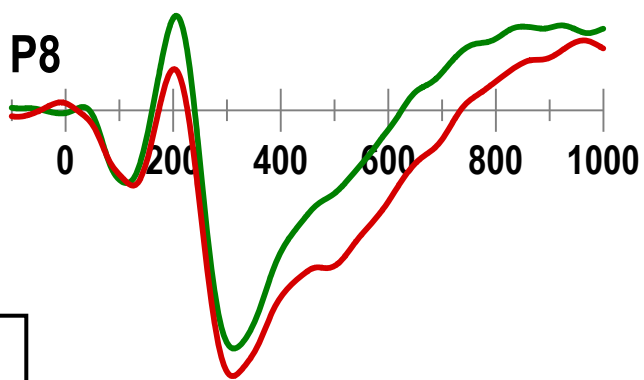

— Neutral  
— Negative

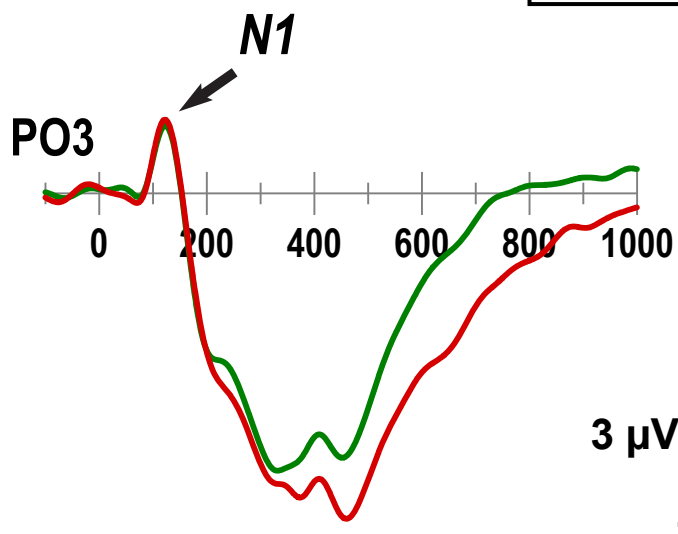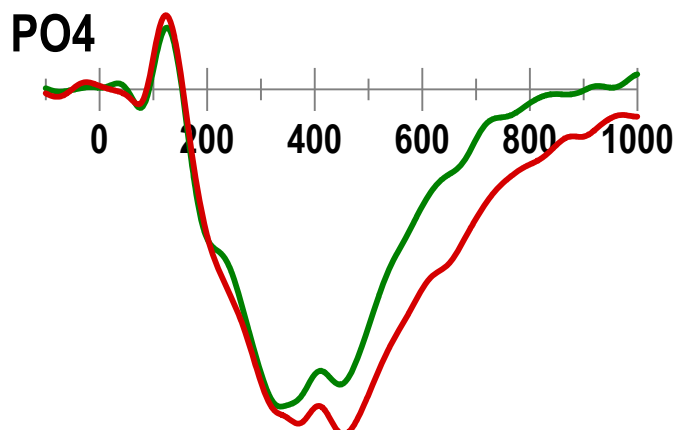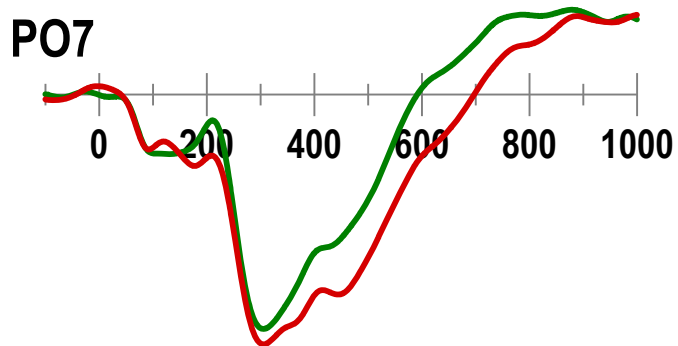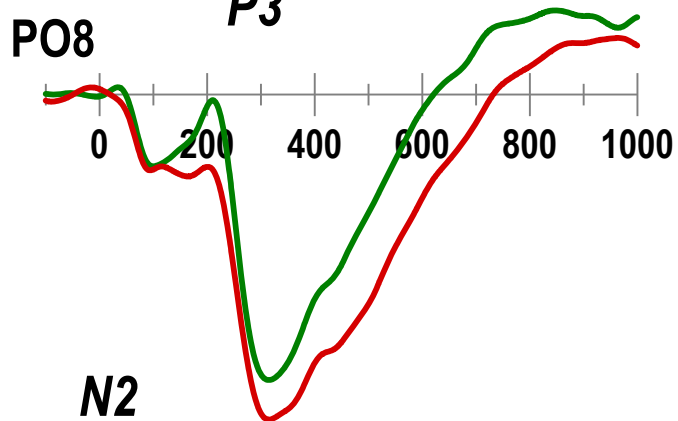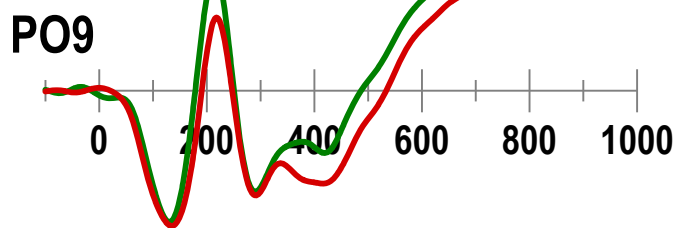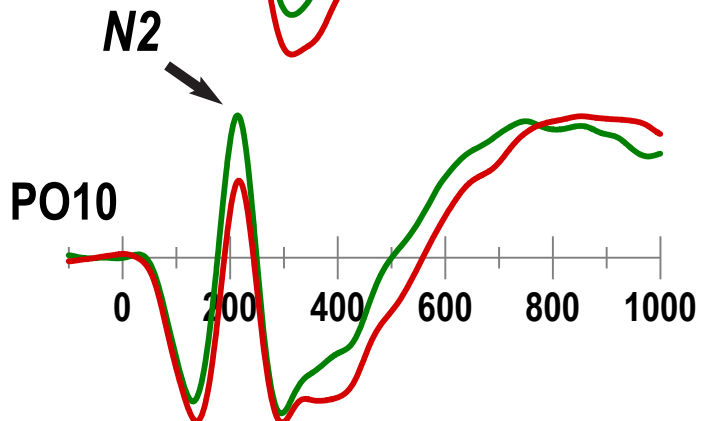

Supplement: NIHMS795633-supplement-5.pdf [file NIHMS795633-supplement-5.pdf]

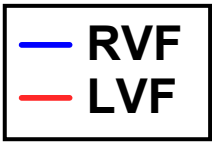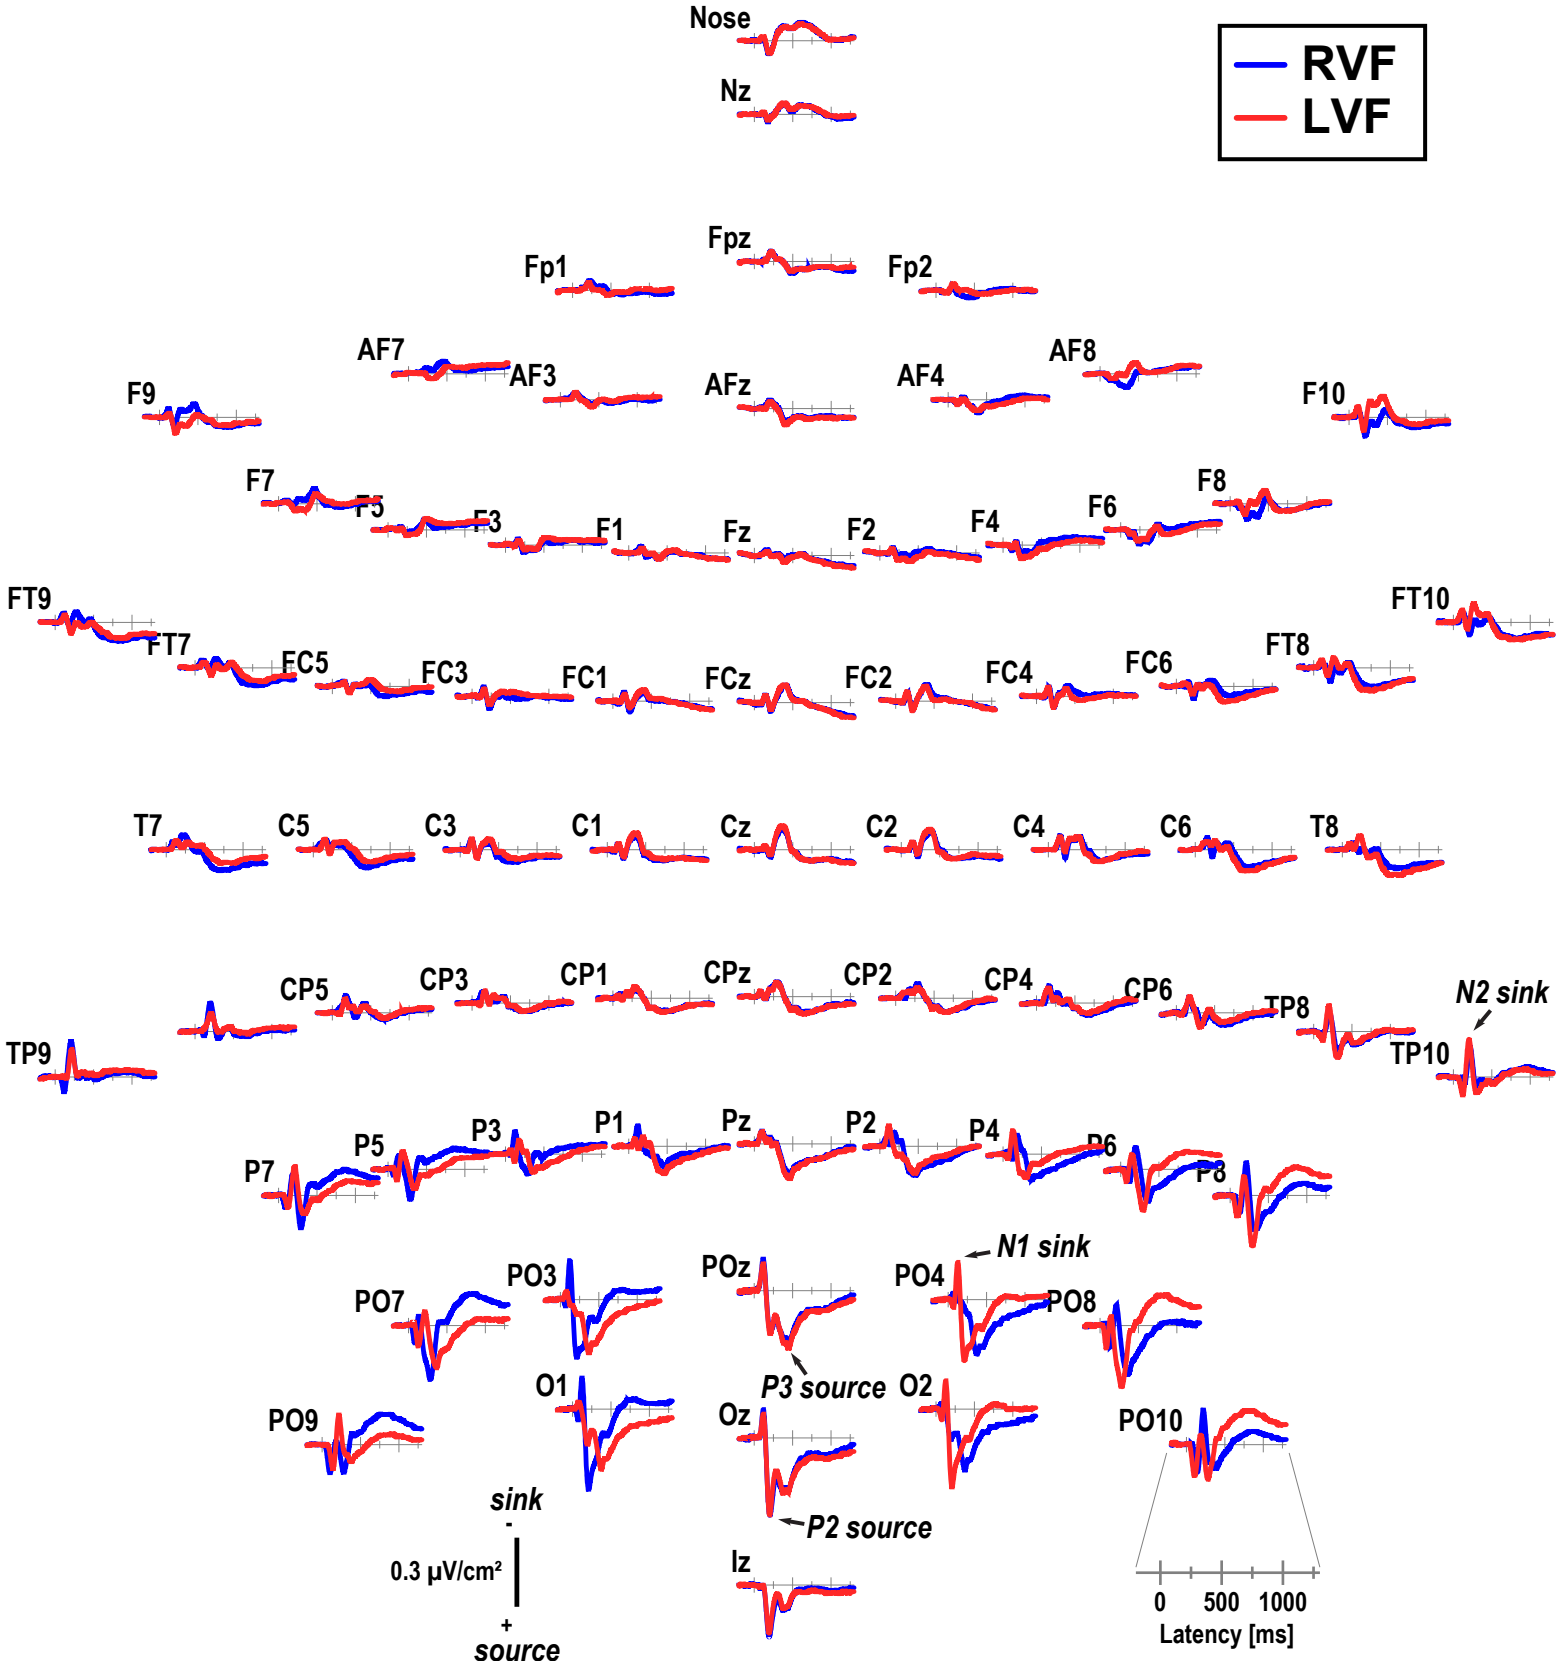

Supplement: NIHMS795633-supplement-6.pdf [file NIHMS795633-supplement-6.pdf]

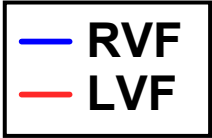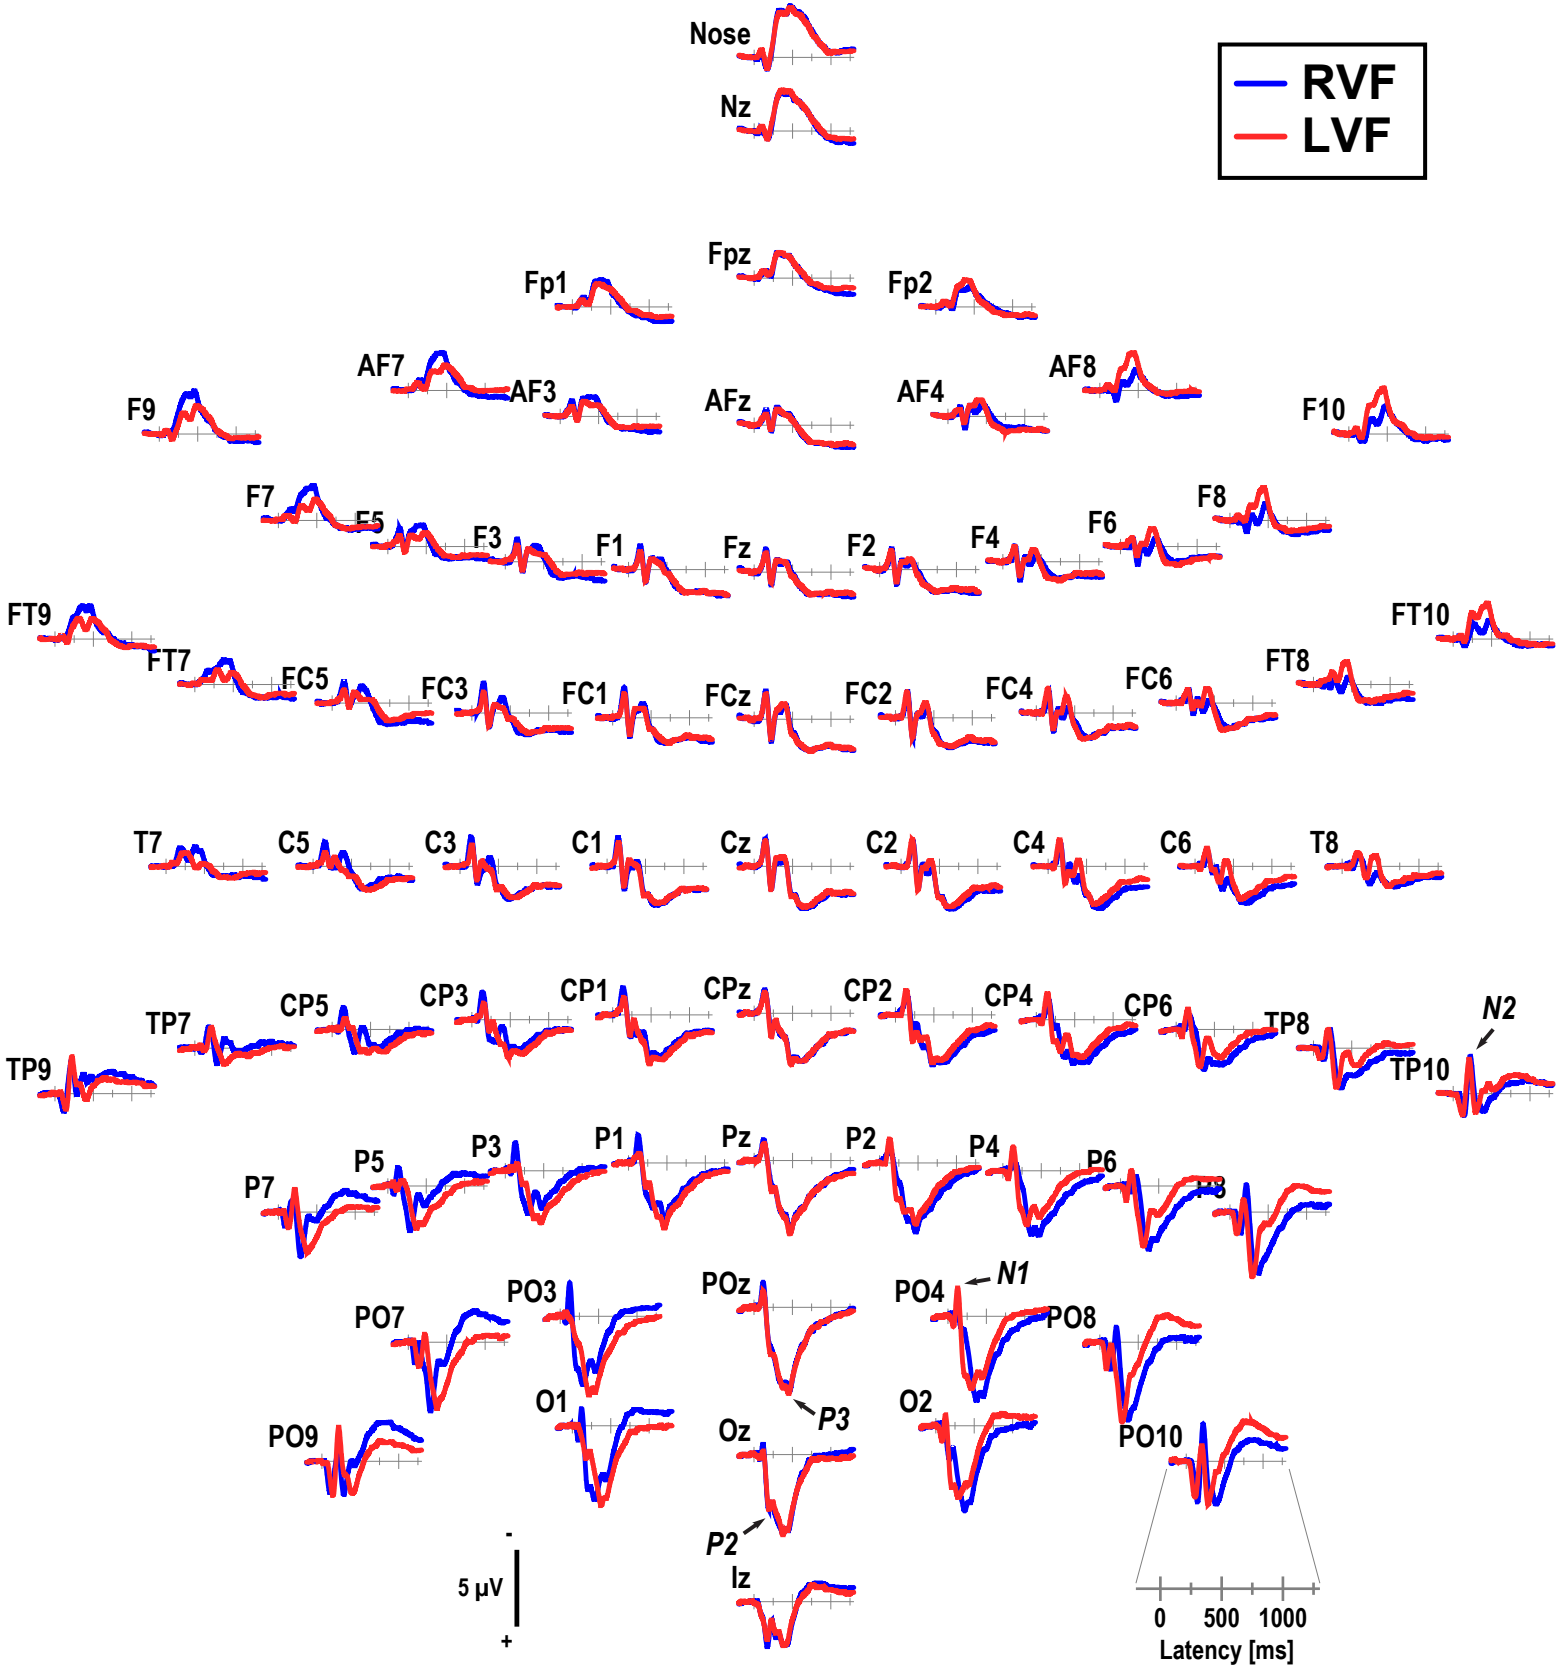

Supplement: NIHMS795633-supplement-7.pdf [file NIHMS795633-supplement-7.pdf]

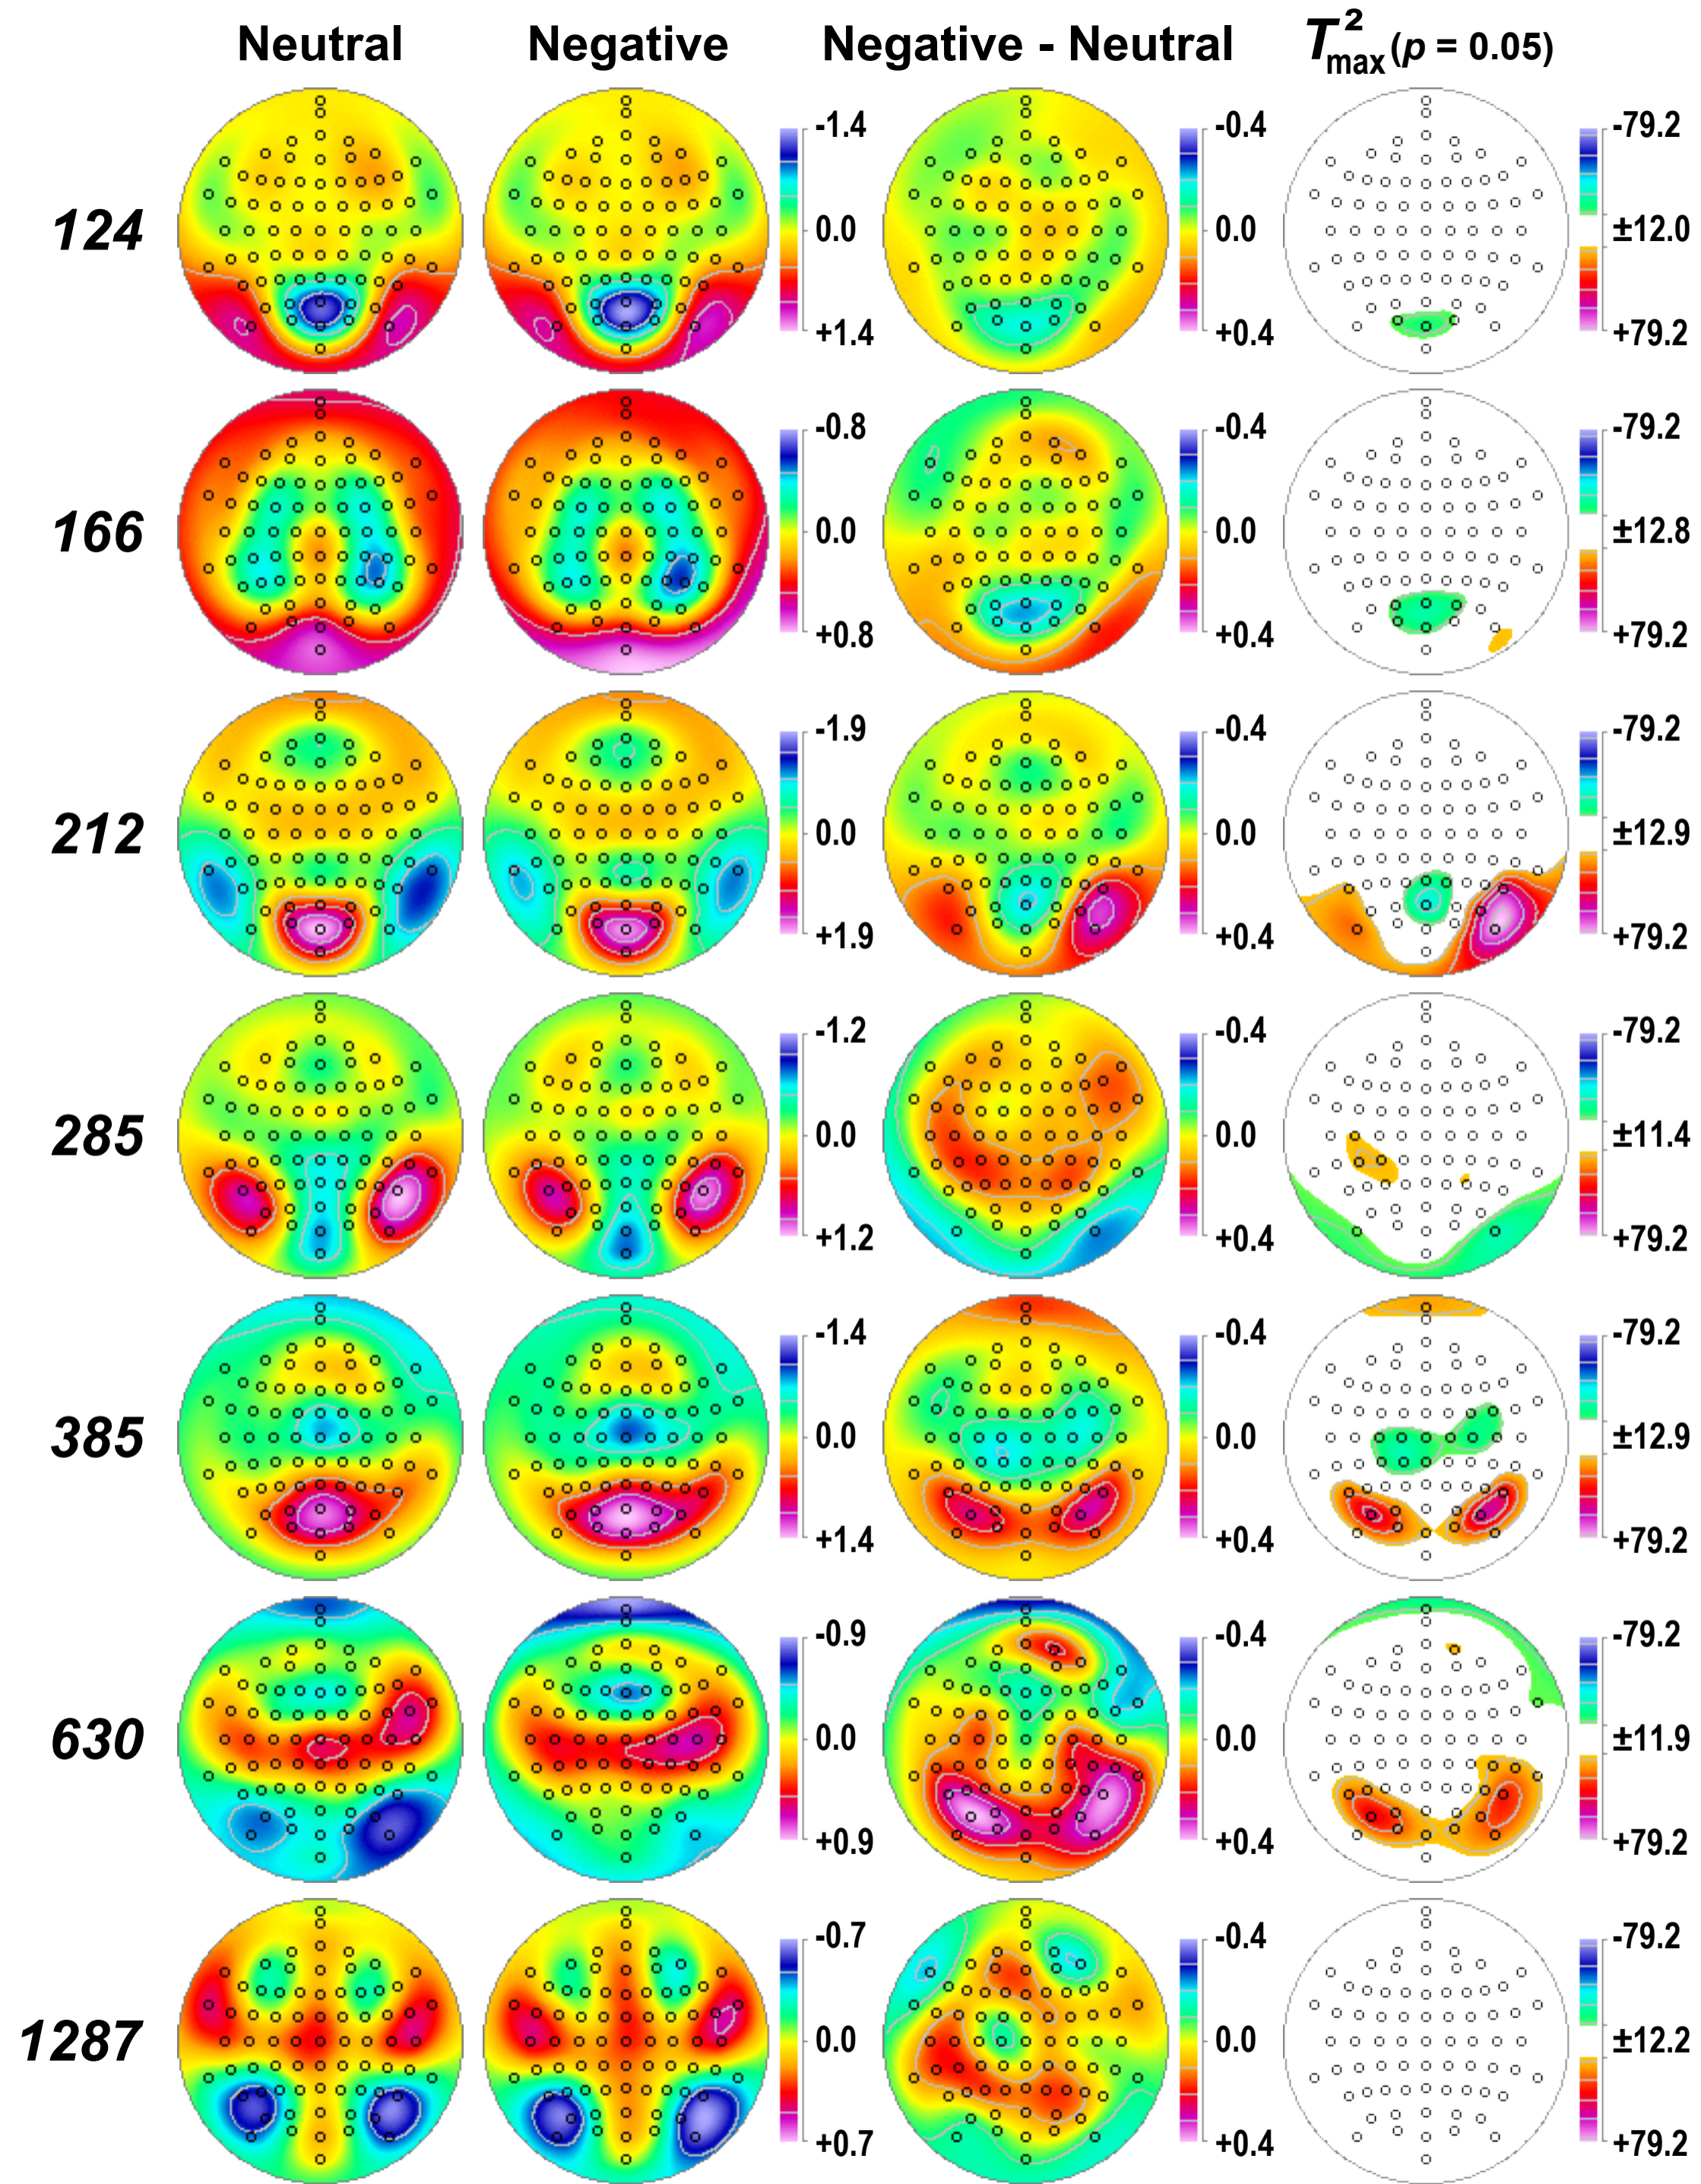

Supplement: NIHMS795633-supplement-8.pdf [file NIHMS795633-supplement-8.pdf]
